# Supplementary material
Source: Springer Nature journal article supplement (https://www.springermedizin.de/resource/supplementary/12891_2013_1837_MOESM2_ESM.pdf/9508604)

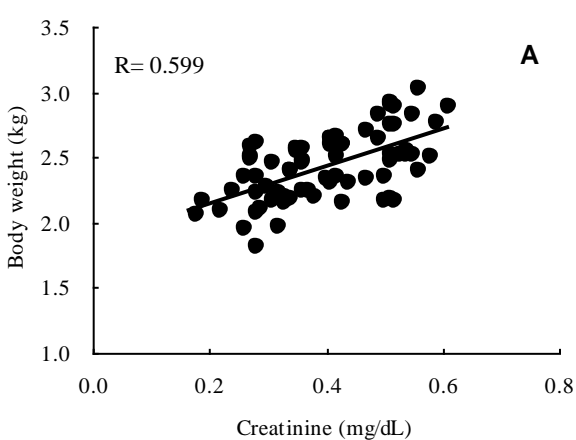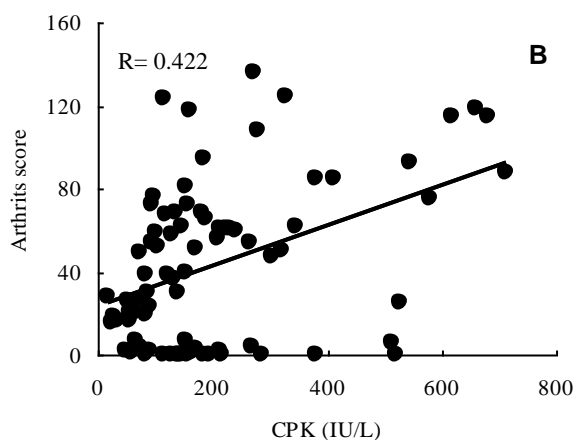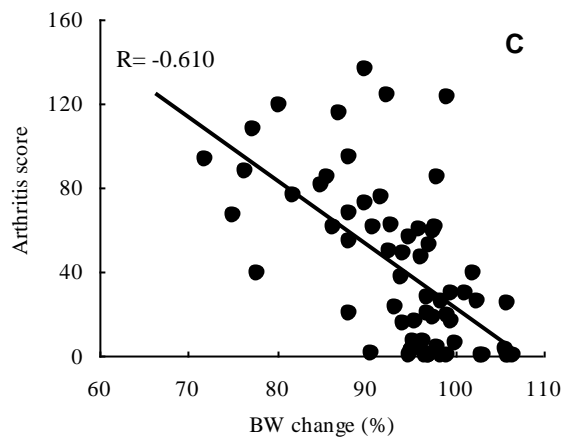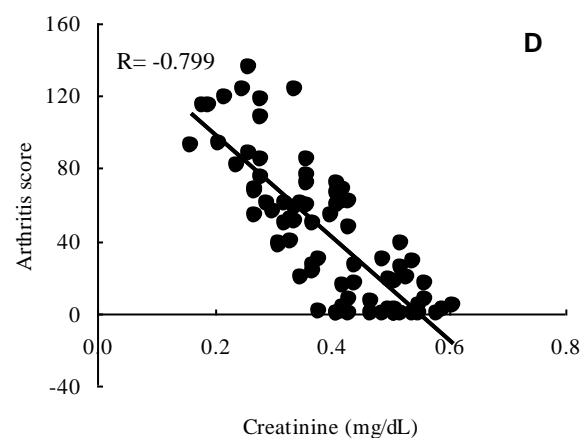

Supplement: MOESM2 [file 9508604]
